# Supplementary material
Source: Research Square preprint supplement (doi:10.21203/rs.3.rs-9667716/v1)
Supplement: Supplementary file 1 [file 5fc2fce8ecd49dd9812ee132.docx]

| **Supplementary Table S1.** Summary of Key Measurements | | |
| --- | --- | --- |
| **Measurement** | **Method/Instrument** | **Notes** |
| Weight & Height | Digital scale, stadiometer | Light clothing, no shoes |
| Body Mass Index (BMI) | Calculated (kg/m²) | — |
| Waist circumference | Non-stretchable tape at navel | Rounded to nearest 0.1 cm |
| Blood pressure | Mercury sphygmomanometer | Two readings after 15 min rest |
| Fasting plasma glucose | Enzymatic method | 12–14 h fasting before sampling |
| Lipid profile (TC, TG) | Enzymatic kits | Standard assays |
| HDL-C | Phosphotungstic acid method | — |
