# Supplementary material
Source: Research Square preprint supplement (doi:10.21203/rs.3.rs-9667716/v1)
Supplement: Supplementary file 2 [file df8515b16127b66feed88a91.docx]

| Table 1: Baseline characteristics of participants at phase III of TLGS study | | | | | | | |
| --- | --- | --- | --- | --- | --- | --- | --- |
| Variables | Total  (n=1872) | Male  (n=887) | Female  (n=985) | P-value | Non-CVD  (n=1755) | CVD  (n=117) | P-value |
| Gender |  |  |  | - |  |  | 0.067 |
| Male | - | - | - |  | 822(46.8) | 65(55.6) |  |
| Female | - | - | - |  | 933(53.2) | 52(44.4) |  |
| Age (year) | 50.82±8.51 | 51.34±8.82 | 50.36±8.21 | 0.013 | 50.33±8.21 | 58.21±9.52 | <0.001 |
| BMI (kg/m2 ) | 28.34±4.38 | 26.95±3.83 | 29.60±4.46 | <0.001 | 28.30±4.39 | 28.98±4.21 | 0.101 |
| Wc (cm) | 94.22±10.86 | 96.07±9.75 | 92.54±11.53 | <0.001 | 93.95±10.89 | 98.21±9.56 | <0.001 |
| SBP (mmHg) | 117.72±16.72 | 119.14±16.27 | 116.44±17.03 | <0.001 | 117.09±16.38 | 127.17±18.91 | <0.001 |
| DBP (mmHg) | 76.43±8.91 | 77.36±8.81 | 75.58±8.93 | <0.001 | 76.28±8.93 | 78.67±8.43 | 0.005 |
| Serum creatinine (μmol/L) | 93.45±14.47 | 101.70±12.03 | 86.02±12.29 | <0.001 | 93.29±14.41 | 95.92±15.26 | 0.056 |
| FPG (mmol/l) | 5.31±1.49 | 5.40±1.51 | 5.24±1.48 | 0.021 | 5.26±1.39 | 6.12±2.49 | <0.001 |
| 2-h PG (mmol/l) | 6.17±2.49 | 6.16±2.86 | 6.18±2.11 | 0.834 | 6.12±2.44 | 7.07±3.05 | 0.003 |
| TG (mmol/l) † | 1.52(1.12,2.07) | 1.59(1.16,2.14) | 1.48(1.11,1.99) | 0.001 | 1.52(1.12,2.07) | 1.58(1.18,1.98) | 0.640 |
| TC (mmol/l) | 4.96±0.75 | 4.89±0.73 | 5.03±0.76 | <0.001 | 4.95±0.75 | 5.11±0.76 | 0.023 |
| HDL-C (mmol/l) | 1.08±0.25 | 1.00±0.22 | 1.15±0.26 | <0.001 | 1.08±0.25 | 1.08±0.26 | 0.951 |
| LDL-C (mmol/l) | 3.11±0.67 | 3.09±0.66 | 3.14±0.67 | 0.099 | 3.11±0.66 | 3.26±0.68 | 0.019 |
| Non-HDL-C (mmol/L) | 3.88±0.74 | 3.89±0.72 | 3.87±0.76 | 0.761 | 3.87±0.74 | 4.03±0.77 | 0.023 |
| AI | 3.81±1.20 | 4.08±1.16 | 3.57±1.19 | <0.001 | 3.80±1.20 | 3.96±1.26 | 0.155 |
| TyG index | 8.75±0.50 | 8.80±0.49 | 8.70±0.50 | <0.001 | 8.74±0.49 | 8.88±0.53 | 0.004 |
| BMI, body mass index; Wc, Waist circumference; SBP, systolic blood pressure; DBP, diastolic blood pressure; FPG, fasting plasma glucose; 2-hPG, 2-hour post-challenge plasma glucose; TG, triglyceride; TC, Total Cholesterol; HDL-C, high-density lipoprotein cholesterol; LDL-C, low-density lipoprotein cholesterol; AI, Atherogenic index; TyG index, Triglyceride-glucose index.  Data are given as the mean±SD or median (IQ 25–75) for continuous variables unless otherwise indicated († ), and data are given as the n(%) for categorical variables | | | | | | | |

| Table 2: Mean change of metabolic risk factors between CVD convertors vs non-CVD convertors for every 3 years during 15 years of follow-up in participants at phase III of TLGS study | | | | |
| --- | --- | --- | --- | --- |
| Variables |  | Ptrend | Model 1  Pinteraction | Model 2  Pinteraction |
| BMI (kg/m2 ) | CVD | 0.450 | 0.095 | 0.195 |
|  | Non-CVD | <0.001 |  |  |
| Wc (cm) | CVD | 0.004 | 0.148 | 0.747 |
|  | Non-CVD | <0.001 |  |  |
| SBP (mmHg) | CVD | <0.001 | 0.013 | 0.013 |
|  | Non-CVD | <0.001 |  |  |
| DBP (mmHg) | CVD | <0.001 | 0.178 | 0.128 |
|  | Non-CVD | <0.001 |  |  |
| Serum creatinine (μmol/L) | CVD | <0.001 | 0.232 | 0.119 |
|  | Non-CVD | <0.001 |  |  |
| FPG (mmol/l) | CVD | <0.001 | 0.031 | 0.060 |
|  | Non-CVD | <0.001 |  |  |
| 2-h PG (mmol/l) | CVD | 0.014 | 0.994 | 0.805 |
|  | Non-CVD | <0.001 |  |  |
| TG (mmol/l) | CVD | 0.668 | 0.201 | >0.999 |
|  | Non-CVD | <0.001 |  |  |
| TC (mmol/l) | CVD | 0.064 | 0.715 | 0.735 |
|  | Non-CVD | <0.001 |  |  |
| HDL-C (mmol/l) | CVD | <0.001 | 0.259 | 0.327 |
|  | Non-CVD | <0.001 |  |  |
| LDL-C (mmol/l) | CVD | 0.922 | 0.256 | 0.390 |
|  | Non-CVD | <0.001 |  |  |
| Non-HDL-C (mmol/L) | CVD | 0.994 | 0.521 | 0.563 |
|  | Non-CVD | <0.001 |  |  |
| AI | CVD | <0.001 | 0.122 | 0.173 |
|  | Non-CVD | <0.001 |  |  |
| Risk score | CVD | <0.001 | <0.001 | <0.001 |
|  | Non-CVD | <0.001 |  |  |
| TyG index | CVD | 0.010 | 0.032 | 0.069 |
|  | Non-CVD | 0.005 |  |  |
| Note: model 1—adjusted for age and sex; model 2—adjusted for age, sex, medication use, smoking, physical activity, and family history of CVD.  Abbreviations: BMI, body mass index; Wc, Waist circumference; SBP, systolic blood pressure; DBP, diastolic blood pressure; FPG, fasting plasma glucose; 2-hPG, 2-hour post-challenge plasma glucose; TG, triglyceride; TC, Total Cholesterol; HDL-C, high-density lipoprotein cholesterol; LDL-C, low-density lipoprotein cholesterol; AI, Atherogenic index; TyG index, Triglyceride-glucose index. | | | | |
